# Supplementary material for: Norepinephrine Transporter Gene Variants and Remission From Depression With Venlafaxine Treatment in Older Adults
Source: Atypon-hosted journal article supplement (doi:10.1176/appi.ajp.2016.16050617), 2017-01-10
Supplement: appi.ajp.2016.16050617.ds001.pdf [file appi.ajp.2016.16050617.ds001.pdf]

## **Population stratification analysis**

After scree plot analysis to identify significant principal components (1), we identified principal components C1 and C2 as accounting for the most observed variance in population structure within our sample. Initially, we included C1 and C2 as covariates within our association analyses. However, after covariate analysis revealed that ancestry did not account for significant variance in remission, percentage change of MADRS score or time-to remission, we omitted C1 and C2 to avoid over correcting our models. There was little to no effect of C1 and C2 on the association of SLC6A2 rs2242446 across all three phenotypes of interest (see Supplementary Table S5).

## **Reference**

1. Ledesma RD, Valero-Mora P. Determining the number of factors to retain in EFA: An easy-to-use computer program for carrying out parallel analysis. *Pract Assess Res Eval*. 2007 Feb;12(2):1-1.

**FIGURE S1.** Flow diagram depicting: sample selection process, including exclusion after standard quality checks.

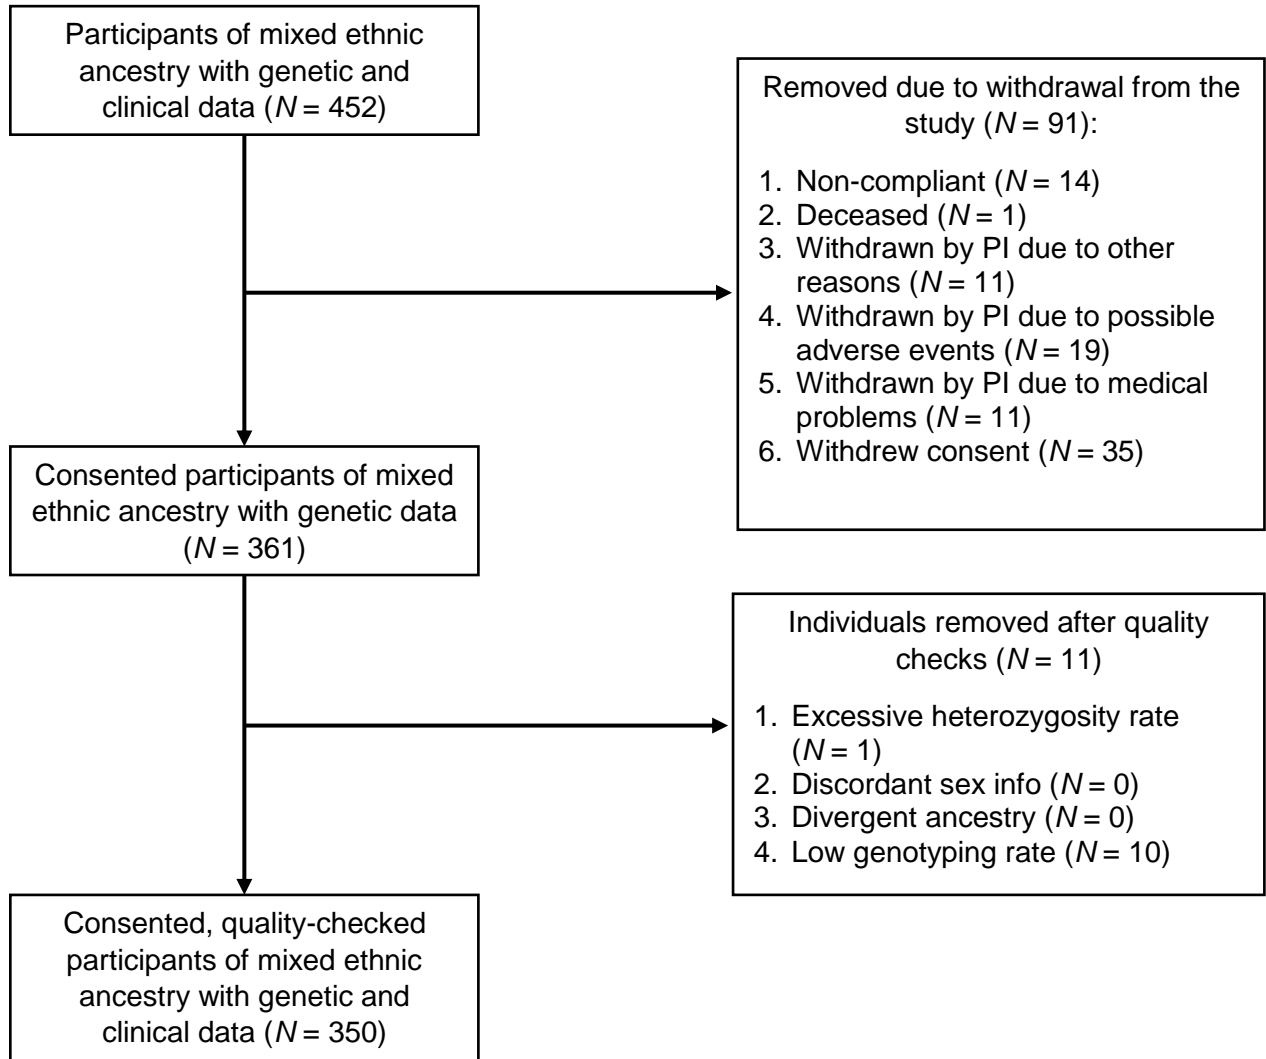

**FIGURE S2.** Association of *SCL6A2* variant rs2242446 with remission, percentage MADRS score change from baseline and time-to remission in the total, European-ancestry sample.

**A. Remission status and rs2242446 ( $p = 0.013$ )**

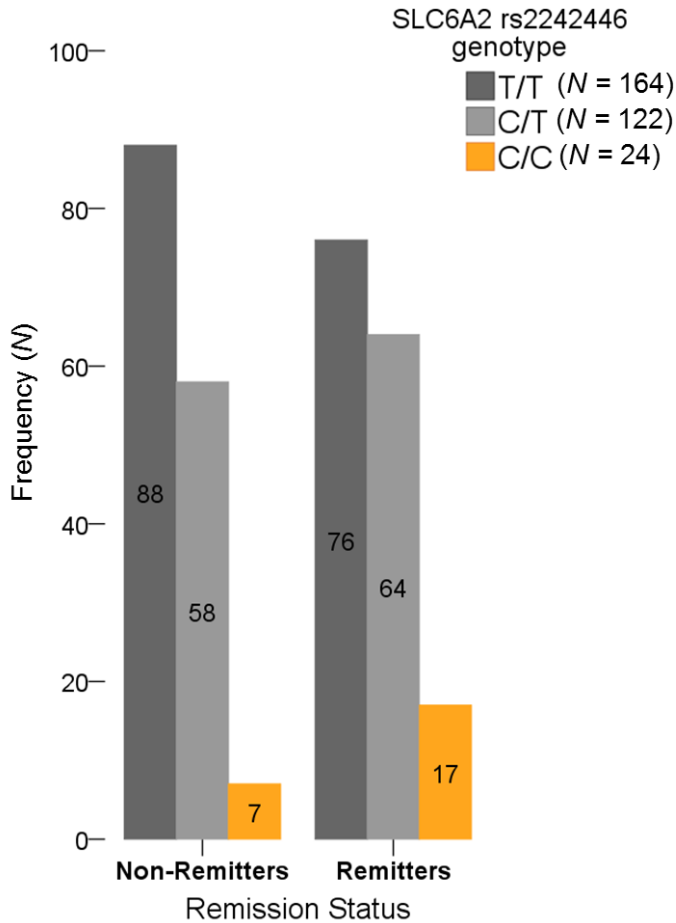

**B. Percentage change of MADRS score and rs2242446 ( $p = 0.013$ )**

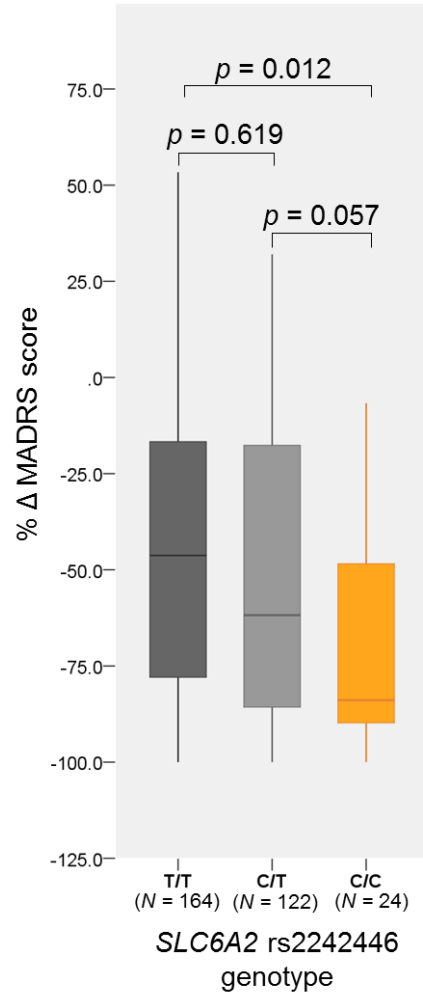

C. Time-to Remission and *SLC6A2* rs2242446 ( $p = 0.020$ )

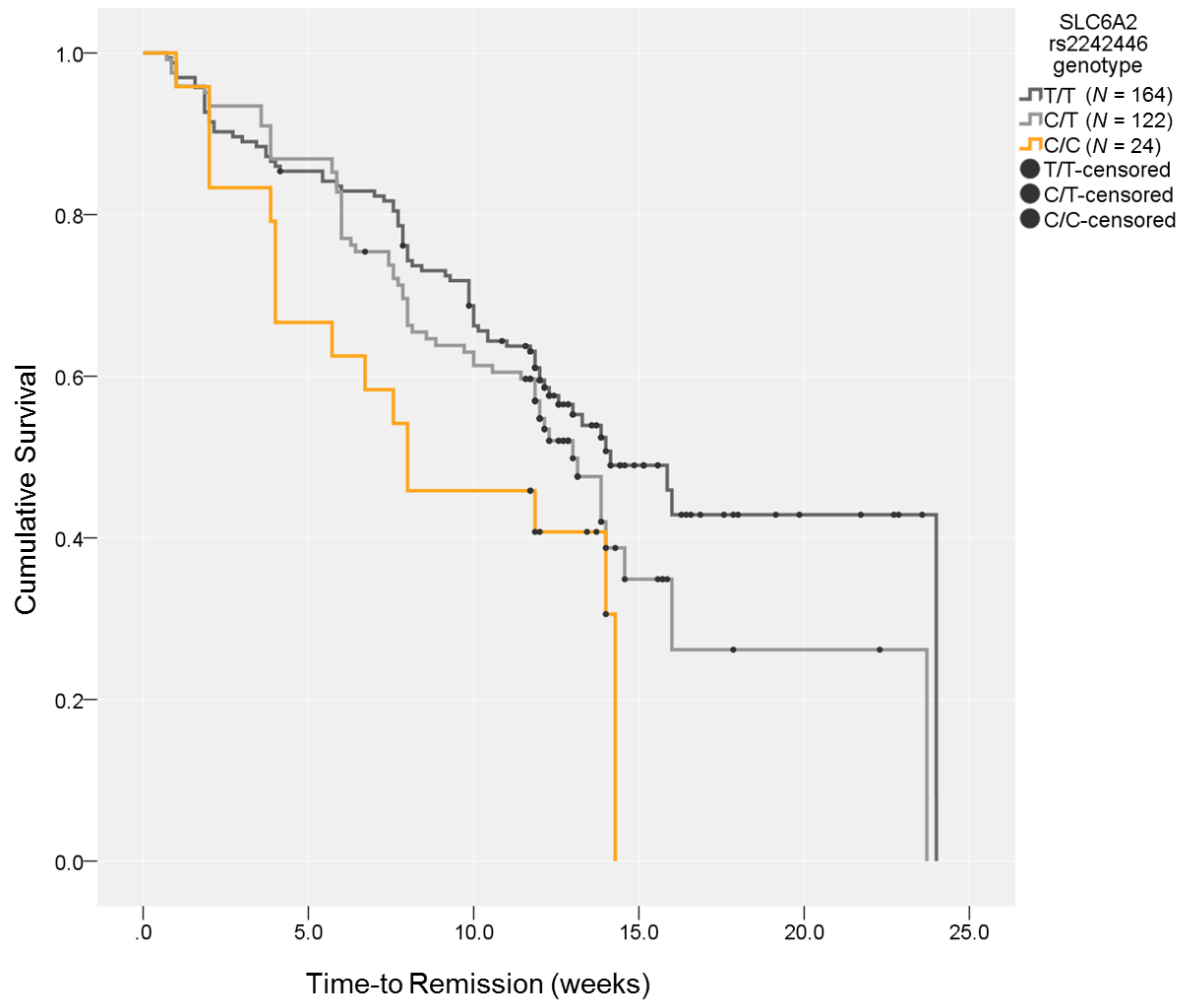

**FIGURE S3.** Neural expression profiles for rs28386840 and rs2242446 across specific brain regions, analyzed in 134 brains of individuals without neurodegenerative disorders (retrieved from *BRAINEAC.org, UK Brain Consortium*).

**A. eQTLs for *SLC6A2* rs2242446 across brain regions.**

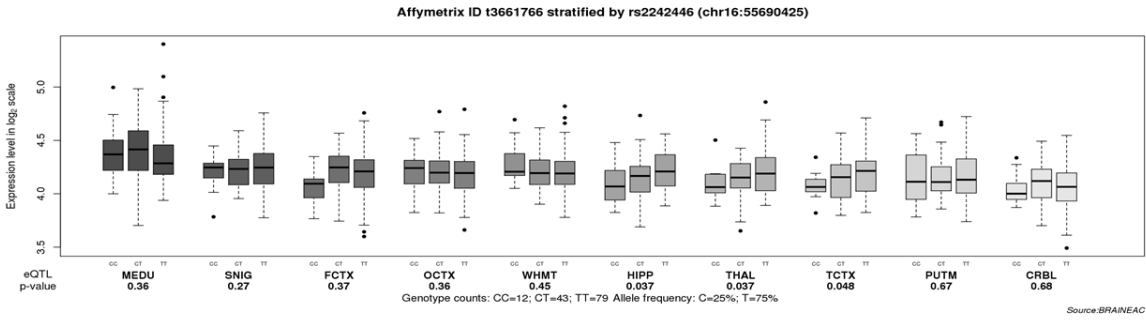

**B. eQTLs for *SLC6A2* rs28386840 across brain regions.**

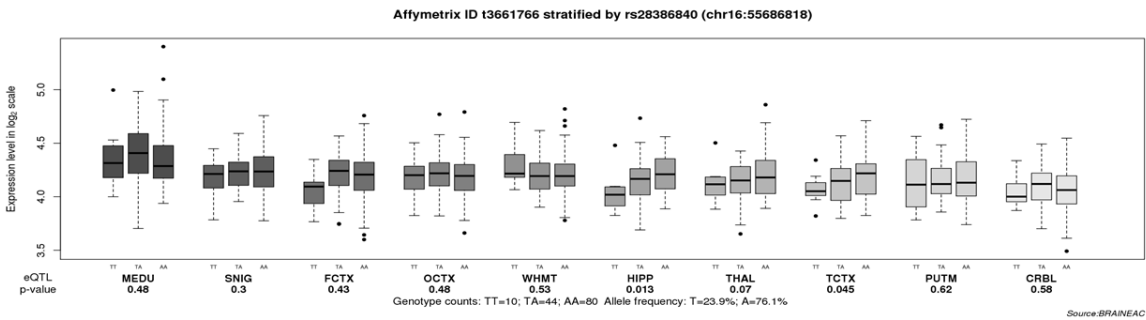

*Abbreviations:* CRBL, cerebellum; eQTL, expression quantitative trait loci; FCTX, frontal cortex; HIPP, hippocampus; MEDU, medulla; OCTX, occipital cortex; PUTM, putamen; SNIG, substantia nigra; TCTX, temporal cortex; WHMT, white matter.

**TABLE S1.** Genetic variants genotyped.

| Gene             | Variant (SNP) | CHR | Location (BP) | Type   | Minor Allele (Ref > Alt) | Global / Sample MAF      | Functional Annotations                                      |
|------------------|---------------|-----|---------------|--------|--------------------------|--------------------------|-------------------------------------------------------------|
| <b>Primary</b>   |               |     |               |        |                          |                          |                                                             |
| <i>SLC6A2</i>    | rs2242446     | 16  | 55656513      | 5' UTR | C > T                    | 0.25 / 0.26              | 8 PHMs; 10 EHMs; 12 DHS; 1 TFBS; 4 $\Delta$ motifs; 4 eQTLs |
|                  | rs5569        | 16  | 55697923      | SYN    | G > A                    | 0.23 / 0.30              | 2 EHMs; 1 DHS; 1 $\Delta$ motifs                            |
| <i>SLC6A4</i>    | rs25531       | 17  | 30237328      | UPS    | T > C                    | 0.14 / 0.11              | 4 PHMs; 19 EHMs; 8 $\Delta$ motifs                          |
|                  | 5-HTTLPR      | 17  | -             | PRM    | L / S                    | -                        | -                                                           |
|                  | STin2 VNTR    | 17  | -             | INT    | 12, 10, 9, 7             | -                        | -                                                           |
| <b>Secondary</b> |               |     |               |        |                          |                          |                                                             |
| <i>HTR1A</i>     | rs6295        | 5   | 63962738      | INT    | C > G                    | 0.45 / 0.48              | 4 PHMs; 1 EHMs; 2 $\Delta$ motifs; 1 eQTLs                  |
| <i>HTR1B</i>     | rs11568817    | 6   | 77463665      | UPS    | A > C                    | 0.30 / 0.42              | 18 PHMs; 7 EHMs; 19 DHS                                     |
|                  | rs130058      | 6   | 77463564      | UPS    | T > A                    | 0.18 / 0.26              | 18 PHMs; 7 EHMs; 25 DHS; 9 $\Delta$ motifs                  |
|                  | rs6296        | 6   | 77462543      | SYN    | C > G                    | 0.34 / 0.26              | 15 PHMs; 6 EHMs; 16 DHS; 3 TFBS                             |
| <i>HTR2A</i>     | rs2274639     | 13  | 46856128      | EXN    | C > G                    | 0.18 / 0.13              | 2 EHMs; 1 DHS; 2 $\Delta$ motifs                            |
|                  | rs6311        | 13  | 46897343      | UPS    | C > T                    | 0.44 / 0.45              | 11 PHMs; 8 EHMs; 7 DHS; 2 $\Delta$ motifs                   |
|                  | rs9567746     | 13  | 46882413      | INT    | A > G                    | 0.14 / 0.18              | 3 $\Delta$ motifs                                           |
| <i>HTR2C</i>     | rs17260600    | 23  | 114786945     | INT    | A > C                    | 0.03 <sup>†</sup> / 0.03 | 1 PHMs; 4 $\Delta$ motifs                                   |
|                  | rs1801412     | 23  | 114908141     | 3'UTR  | T > G                    | 0.06 / 0.05              | 2 EHMs; 2 $\Delta$ motifs                                   |
|                  | rs3813929     | 23  | 114584047     | UPS    | C > T                    | 0.12 / 0.17              | 7 PHMs; 11 EHMs; 7 DHS; 1 TFBS                              |
|                  | rs518147      | 23  | 114584109     | 5'UTR  | G > C                    | 0.17 / 0.36              | 7 PHMs; 11 EHMs; 7 DHS; 1 TFBS                              |
|                  | rs6318        | 23  | 114731326     | MIS    | G > C                    | 0.17 / 0.18              | 5 $\Delta$ motifs                                           |
|                  | rs6644093     | 23  | 114829460     | INT    | G > T                    | 0.13 / 0.14              | 3 eQTLs                                                     |
| <i>TPH1</i>      | rs1800532     | 11  | 18026269      | INT    | G > T                    | 0.32 / 0.38              | 3 GRASP QTLs; 13 eQTLs                                      |
| <i>TPH2</i>      | rs11178997    | 12  | 71938373      | UPS    | T > A                    | 0.15 / 0.10              | 4 $\Delta$ motifs                                           |
|                  | rs11178998    | 12  | 71938935      | UPS    | A > G                    | 0.08 / 0.08              | 5 PHMs; 13 EHMs; 43 DHS; 25 TFBS; 3 $\Delta$ motifs         |
|                  | rs4570625     | 12  | 71946293      | UPS    | G > T                    | 0.35 / 0.26              | 4 $\Delta$ motifs                                           |

<sup>†</sup>Variant excluded from analysis due to minor allele frequency less than 5% in the whole mixed-ancestry sample.

*Abbreviations.*  $\Delta$ , change; Alt, alternative allele; BP, base pair; CHR, chromosome; DHS, DNase hypersensitivity site; EHM, enhancer histone mark; eQTL, expression quantitative trait loci; EXN, exonic; INT, intronic; MAF, minor allele frequency; Ref, reference allele; SNP, single nucleotide polymorphism; TFBS, transcription factor binding site.

**TABLE S2.** Functional annotations for genotyped ancestry informative markers after quality control ( $N = 46$ ).

| Gene               | Variant (SNP) | CHR | Location (BP) | Type | Minor Allele (Ref > Alt) | Total Sample MAF | Global/ Sample EUR MAF | Global/ Sample AFR MAF | HWE ( $p$ ) | Functional Annotations                                                 |
|--------------------|---------------|-----|---------------|------|--------------------------|------------------|------------------------|------------------------|-------------|------------------------------------------------------------------------|
| <i>HIVEP3</i>      | rs1325502     | 1   | 41894599      | INT  | G > A                    | 0.21             | 0.16 / 0.15            | 0.73 / 0.30            | 0.002       | 3 PHMs; 12 EHMs; 5 DHS; 1 GRASP QTL                                    |
| <i>USP24</i>       | rs12130799    | 1   | 55197699      | INT  | A > G                    | 0.06             | 0.06 / 0.07            | 0.01 / 0.00            | 1.000       | 1 PHM; 8 EHMs; 1 DHS; 2 hits                                           |
| <i>RP4-575N6.5</i> | rs3737576     | 1   | 101244007     | DWN  | T > C                    | 0.05             | 0.06 / 0.05            | 0.01 / 0.03            | 0.077       | 3 EHMs; 1 $\Delta$ motif; 1 GRASP QTL                                  |
| <i>SEMA6C</i>      | rs7554936     | 1   | 151150013     | UPS  | C > T                    | 0.40             | 0.68 / 0.36            | 0.04 / 0.14            | 0.321       | 3 $\Delta$ motifs; 7 GRASP QTLs; 24 eQTLs                              |
| <i>TIPRL</i>       | rs1040404     | 1   | 168190652     | INT  | G > A                    | 0.34             | 0.32 / 0.29            | 0.84 / 0.21            | 0.159       | 2 DHS; 1 TFBS; 1 $\Delta$ motif; 8 GRASP QTLs; 23 eQTLs                |
| <i>HMCN1</i>       | rs1407434     | 1   | 186179900     | INT  | G > A                    | 0.10             | 0.10 / 0.09            | 0.24 / 0.20            | 0.401       | 3 EHMs; 1 eQTL                                                         |
| <i>AC007463.2</i>  | rs798443      | 2   | 7828144       | DWN  | G > A                    | 0.28             | 0.82 / 0.22            | 0.07 / 0.15            | 0.001       | 5 $\Delta$ motifs; 8 GRASP QTLs                                        |
| <i>AC011897.2</i>  | rs7421394     | 2   | 14616225      | UPS  | A > G                    | 0.36             | 0.28 / 0.30            | 0.93 / 0.12            | 0.002       | 2 EHMs; 1 GRASP QTL; 1 eQTL                                            |
| <i>ALK</i>         | rs4666200     | 2   | 29315545      | INT  | G > A                    | 0.32             | 0.72 / 0.28            | 0.13 / 0.30            | 0.466       | 3 PHMs; 10 EHMs; 5 DHS; 1 TFBS; 3 $\Delta$ motifs; 1 GRASP QTL; 1 eQTL |
| <i>CDC42EP3</i>    | rs4670767     | 2   | 37714253      | INT  | G > T                    | 0.12             | 0.11 / 0.12            | 0.04 / 0.05            | 0.027       | 1 PHM; 3 EHMs; 4 $\Delta$ motifs; 1 GRASP QTL                          |
| <i>CTNNA2</i>      | rs13400937    | 2   | 79637797      | INT  | T > G                    | 0.32             | 0.24 / 0.25            | 0.86 / 0.14            | 0.007       | 4 $\Delta$ motifs                                                      |
| <i>EDAR</i>        | rs260690      | 2   | 108963282     | INT  | C > A                    | 0.14             | 0.92 / 0.09            | 0.35 / 0.45            | 0.000       | 3 EHMs; 1 DHS; 2 TFBS; 2 $\Delta$ motifs                               |
| <i>AC074093.1</i>  | rs10496971    | 2   | 145012376     | INT  | T > G                    | 0.10             | 0.07 / 0.09            | 0.05 / 0.12            | 0.131       | 10 DHS; 5 TFBS; 5 $\Delta$ motifs; 1 GRASP QTL                         |
| <i>GORASP1</i>     | rs9809104     | 3   | 39104938      | INT  | T > C                    | 0.26             | 0.21 / 0.20            | 0.86 / 0.18            | 0.008       | 2 PHMs; 16 EHMs; 5 GRASP QTLs; 11 eQTLs                                |
| <i>ROBO1</i>       | rs6548616     | 3   | 79350425      | INT  | T > C                    | 0.34             | 0.30 / 0.29            | 0.91 / 0.20            | 0.054       | 3 $\Delta$ motifs                                                      |
| <i>GTF2E1</i>      | rs12629908    | 3   | 120803869     | DWN  | G > A                    | 0.06             | 0.05 / 0.05            | 0.11 / 0.14            | 0.111       | 4 $\Delta$ motifs                                                      |
| <i>LPP</i>         | rs1513181     | 3   | 188857208     | INT  | G > A                    | 0.14             | 0.17 / 0.14            | 0.19 / 0.09            | 0.670       | 1 EHM; 7 $\Delta$ motifs; 1 GRASP QTL                                  |
| <i>LIMCH1</i>      | rs10007810    | 4   | 41552347      | INT  | G > A                    | 0.28             | 0.20 / 0.22            | 0.93 / 0.14            | 0.002       | 2 DHS; 1 $\Delta$ motif; 1 GRASP QTL                                   |
| <i>Y_RNA</i>       | rs316598      | 5   | 2364512       | DWN  | T > C                    | 0.33             | 0.26 / 0.28            | 0.95 / 0.14            | 0.006       | -                                                                      |

|                        |            |    |           |     |       |      |             |             |                    |                                                                      |
|------------------------|------------|----|-----------|-----|-------|------|-------------|-------------|--------------------|----------------------------------------------------------------------|
| <i>7SK</i>             | rs870347   | 5  | 6844922   | DWN | A > C | 0.05 | 0.08 / 0.05 | 0.07 / 0.06 | 0.259              | 1 GRASP QTL; 1 eQTL                                                  |
| <i>NNT</i>             | rs6451722  | 5  | 43711276  | DWN | G > A | 0.28 | 0.20 / 0.23 | 0.84 / 0.23 | 0.003              | 1 DHS; 3 Δ motifs; ; 18 eQTLs                                        |
| <i>SGCD</i>            | rs6556352  | 5  | 156044704 | INT | C > T | 0.35 | 0.34 / 0.29 | 0.95 / 0.11 | 0.015              | 12 Δ motifs                                                          |
| <i>CDYL</i>            | rs1040045  | 6  | 4746925   | INT | G > A | 0.32 | 0.72 / 0.27 | 0.19 / 0.18 | 0.052              | 1 Δ motif; 1 eQTL                                                    |
| <i>RP11-125M16.1</i>   | rs2504853  | 6  | 12534879  | DWN | T > C | 0.33 | 0.27 / 0.26 | 0.92 / 0.05 | 0.002              | 3 EHMs; 1 DHS; 1 Δ motif;                                            |
| <i>PKHD1</i>           | rs2397060  | 6  | 51746672  | INT | T > C | 0.20 | 0.14 / 0.15 | 0.74 / 0.30 | 4×10 <sup>-4</sup> | 2 Δ motifs                                                           |
| <i>UTRN</i>            | rs4463276  | 6  | 144734195 | INT | G > A | 0.31 | 0.23 / 0.25 | 0.90 / 0.16 | 1.000              | 5 Δ motifs; 1 eQTL                                                   |
| <i>SCIN</i>            | rs731257   | 7  | 12629626  | INT | G > A | 0.14 | 0.16 / 0.15 | 0.03 / 0.02 | 0.589              | 1 DHS; 2 Δ motifs; 1 GRASP QTL                                       |
| <i>ELN</i>             | rs4717865  | 7  | 74039869  | INT | G > A | 0.08 | 0.09 / 0.08 | 0.01 / 0.00 | 0.019              | 1 PHM; 12 EHMs; 3 DHS; 1 Δ motif; 1 GRASP QTL                        |
| <i>DLC1</i>            | rs3943253  | 8  | 13501991  | INT | A > G | 0.07 | 0.06 / 0.05 | 0.36 / 0.19 | 1.000              | 6 PHMs; 1 EHM; 4 DHS; 2 Δ motifs                                     |
| <i>KIF13B</i>          | rs1471939  | 8  | 29083788  | INT | C > T | 0.26 | 0.80 / 0.24 | 0.72 / 0.41 | 1.000              | 1 Δ motif; 2 GRASP QTLs; 2 eQTLs                                     |
| <i>TYRP1</i>           | rs1408801  | 9  | 12672320  | UPS | A > G | 0.15 | 0.11 / 0.10 | 0.51 / 0.48 | 0.055              | 4 Δ motifs; 1 eQTL                                                   |
| <i>ASTN2</i>           | rs10513300 | 9  | 117367927 | INT | T > C | 0.05 | 0.06 / 0.05 | 0.00 / 0.03 | 0.204              | -                                                                    |
| <i>USP54</i>           | rs4746136  | 10 | 73541236  | INT | G > A | 0.12 | 0.18 / 0.13 | 0.02 / 0.06 | 0.448              | 1 EHM; 4 Δ motifs; 1 GRASP QTL                                       |
| <i>HABP2</i>           | rs4918842  | 10 | 113557053 | INT | T > C | 0.11 | 0.11 / 0.11 | 0.09 / 0.08 | 0.054              | 2 PHMs; 13 EHMs; 1 DHS; 2 Δ motifs                                   |
| <i>U6</i>              | rs2946788  | 11 | 23988984  | DWN | G > T | 0.33 | 0.75 / 0.28 | 0.14 / 0.20 | 0.012              | 2 PHMs; 3 EHMs; 2 DHS; 2 Δ motifs; 1 eQTL                            |
| <i>USP12</i>           | rs9319336  | 13 | 27050219  | DWN | T > C | 0.08 | 0.06 / 0.06 | 0.18 / 0.15 | 0.003              | 1 EHM; 1 DHS                                                         |
| <i>LINC00457</i>       | rs7997709  | 13 | 34273600  | DWN | C > T | 0.07 | 0.94 / 0.06 | 0.81 / 0.18 | 0.410              | 1 EHM; 2 Δ motifs                                                    |
| <i>TBC1D4</i>          | rs9530435  | 13 | 75419751  | INT | T > C | 0.23 | 0.84 / 0.18 | 0.14 / 0.26 | 4×10 <sup>-4</sup> | 8 EHMs; 2 DHS; ; 3 Δ motifs; 1 GRASP QTL                             |
| <i>BRF1</i>            | rs3784230  | 14 | 105212718 | INT | A > G | 0.46 | 0.38 / 0.41 | 0.96 / 0.12 | 0.086              | 5 EHMs; 1 DHS; ; 5 Δ motifs; 1 GRASP QTL; 6 eQTLs                    |
| <i>RP11-661P17.1</i>   | rs8035124  | 15 | 91562478  | INT | A > C | 0.27 | 0.16 / 0.21 | 0.70 / 0.23 | 0.001              | 12 EHMs; 3 Δ motifs                                                  |
| <i>LA16c-313D11.12</i> | rs4984913  | 16 | 690466    | INT | A > G | 0.34 | 0.32 / 0.28 | 0.84 / 0.15 | 0.007              | 23 PHMs; 5 EHMs; 53 DHS; 46 TFBs; 3 Δ motifs; 5 GRASP QTLs; 90 eQTLs |
| <i>RP11-256I9.3</i>    | rs818386   | 16 | 65372805  | INT | T > C | 0.17 | 0.80 / 0.19 | 0.99 / 0.00 | 0.125              | 7 EHMs; 8 Δ motifs                                                   |



|                      |           |    |          |     |       |      |             |             |                    |                                                   |
|----------------------|-----------|----|----------|-----|-------|------|-------------|-------------|--------------------|---------------------------------------------------|
| <i>WDR88</i>         | rs8113143 | 19 | 33161341 | INT | C > A | 0.37 | 0.34 / 0.31 | 0.96 / 0.09 | 2×10 <sup>-4</sup> | 7 EHMs; 1 DHS; 3 Δ motifs; 2 GRASP QTLs; 12 eQTLs |
| <i>RP5-839B4.7</i>   | rs6104567 | 20 | 10214785 | INT | T > G | 0.28 | 0.28 / 0.28 | 0.13 / 0.23 | 1.000              | 27 Δ motifs; 2 GRASP QTLs                         |
| <i>RP5-1010E17.2</i> | rs3907047 | 20 | 55384376 | DWN | T > C | 0.04 | 0.05 / 0.04 | 0.01 / 0.00 | 1.000              | 1 Δ motif                                         |
| <i>RP11-191L9.4</i>  | rs5768007 | 22 | 47812123 | INT | C > T | 0.12 | 0.12 / 0.12 | 0.01 / .03  | 0.199              | 2 Δ motifs                                        |

*Abbreviations.* Δ, change; Alt, alternative allele; BP, base pair; CHR, chromosome; DHS, DNase hypersensitivity site; EHM, enhancer histone mark; eQTL, expression quantitative trait loci; EXN, exonic; INT, intronic; MAF, minor allele frequency; Ref, reference allele; SNP, single nucleotide polymorphism; TFBS, transcription factor binding site.

**TABLE S3.** Baseline covariates with venlafaxine remission, percentage MADRS score change post-treatment and time-to remission.

| Potential Covariates            | % Δ MADRS score                                                                                                   |                      |               | Remitters vs. Non-remitters                                                                            |      |            | Time-to Remission (weeks)                                                                                  |                      |             |
|---------------------------------|-------------------------------------------------------------------------------------------------------------------|----------------------|---------------|--------------------------------------------------------------------------------------------------------|------|------------|------------------------------------------------------------------------------------------------------------|----------------------|-------------|
|                                 | <i>M</i>                                                                                                          | <i>r<sub>s</sub></i> | 95% C.I.      | <i>M</i> / Frequency ( <i>N</i> )                                                                      | OR   | 95% C.I.   | <i>M</i>                                                                                                   | <i>r<sub>s</sub></i> | 95% C.I.    |
| Sex*                            | <i>M<sub>F</sub></i> = -55.1±35.9<br><i>M<sub>M</sub></i> = -41.8±38.6                                            | -                    | -             | <i>N<sub>F</sub></i> = 128/95<br><i>N<sub>M</sub></i> = 51/76                                          | 2.00 | 1.28, 3.13 | <i>M<sub>F</sub></i> = 10.6±3.9<br><i>M<sub>M</sub></i> = 10.0±4.9                                         | -                    | -           |
| Age (years)*                    | -                                                                                                                 | -0.18                | -0.28, 0.08   | <i>M<sub>Rem</sub></i> = 69.9±7.6<br><i>M<sub>Non-rem</sub></i> = 67.4±6.1                             | -    | -          | -                                                                                                          | -0.08                | -0.18, 0.03 |
| Ethnic ancestry                 | <i>M<sub>EUR</sub></i> = -49.6±37.1<br><i>M<sub>AFR</sub></i> = -56.5±36.2<br><i>M<sub>ALL</sub></i> = -50.2±37.2 | -                    | -             | <i>N<sub>EUR</sub></i> = 158/153<br><i>N<sub>AFR</sub></i> = 18/15<br><i>N<sub>ALL</sub></i> = 179/171 | -    | -          | <i>M<sub>EUR</sub></i> = 10.4±4.6<br><i>M<sub>AFR</sub></i> = 9.8±4.8<br><i>M<sub>ALL</sub></i> = 10.3±4.6 | -                    | -           |
| Site (A, B or C)*               | <i>M<sub>A</sub></i> = -58.4±33.9<br><i>M<sub>B</sub></i> = -45.8±41.0<br><i>M<sub>C</sub></i> = -43.1±36.2       | -                    | -             | <i>N<sub>A</sub></i> = 87/59<br><i>N<sub>B</sub></i> = 47/46<br><i>N<sub>C</sub></i> = 45/63           | -    | -          | <i>M<sub>A</sub></i> = 9.7±4.7<br><i>M<sub>B</sub></i> = 9.7±4.0<br><i>M<sub>C</sub></i> = 11.5±5.0        | -                    | -           |
| Baseline MADRS score*           | -                                                                                                                 | 0.21                 | 0.11, 0.31    | <i>M<sub>Rem</sub></i> = 24.8±5.3<br><i>M<sub>Non-R</sub></i> = 28.4±5.4                               | -    | -          | -                                                                                                          | 0.29                 | 0.19, 0.38  |
| Treatment length (days)*        | -                                                                                                                 | -0.11                | -0.21, -0.005 | <i>M<sub>Rem</sub></i> = 97.0±18.8<br><i>M<sub>Non-rem</sub></i> = 92.4±18.4                           | -    | -          | -                                                                                                          | 0.42                 | 0.33, 0.50  |
| Age of onset (years)            | -                                                                                                                 | -0.08                | -0.18, 0.03   | <i>M<sub>Rem</sub></i> = 43.0±21.9<br><i>M<sub>Non-rem</sub></i> = 39.0±21.3                           | -    | -          | -                                                                                                          | -0.12                | -0.22, 0.02 |
| Current MDE duration (weeks)*   | -                                                                                                                 | 0.12                 | 0.01, 0.22    | <i>M<sub>Rem</sub></i> = 227.7±540.5<br><i>M<sub>Non-rem</sub></i> = 430.4±782.1                       | -    | -          | -                                                                                                          | 0.24                 | 0.13, 0.33  |
| MDE type (single vs. recurrent) | <i>M<sub>S</sub></i> = -45.6±38.0<br><i>M<sub>R</sub></i> = -51.9±36.9                                            | -                    | -             | <i>N<sub>S</sub></i> = 44/51<br><i>N<sub>R</sub></i> = 135/120                                         | 1.30 | 0.81, 2.09 | <i>M<sub>S</sub></i> = 10.6±4.8<br><i>M<sub>R</sub></i> = 10.2±4.8                                         | -                    | -           |

Note. All associations were derived from bivariate analyses (without covariates).

Abbreviations: Δ, change; 95% C.I., 95% confidence interval; AFR, African ancestry; *d*, Cohen's *d*; EUR, European ancestry; *F*, female; *M*, male; *M*, mean; MDE, major depressive episode; OR, odds ratio; R, recurrent; Rem, remission; *r<sub>s</sub>*, Spearman rank correlation coefficient; S, single; VEN, venlafaxine.

Significance levels: \**p* ≤ 0.05

**TABLE S4.** Multivariate logistic regression results examining the association between remission status and *SLC6A2* rs2242446 genotype in the total, mixed ancestry sample.

|                                  | $\beta$ | S.E. | Wald  | Sig. ( <i>p</i> ) | OR   | 95% C.I. |       |
|----------------------------------|---------|------|-------|-------------------|------|----------|-------|
|                                  |         |      |       |                   |      | Lower    | Upper |
| Site                             | -0.19   | .14  | 1.79  | <b>.180</b>       | 0.83 | 0.62     | 1.09  |
| Age                              | 0.03    | .02  | 3.61  | <b>.057</b>       | 1.04 | 0.99     | 1.07  |
| Sex                              | 0.83    | .25  | 10.76 | <b>.001</b>       | 2.30 | 1.40     | 3.78  |
| Baseline MADRS score             | -.14    | .02  | 31.80 | <b>&lt;.001</b>   | .87  | 0.83     | .92   |
| Treatment length (days)          | .28     | .12  | 5.23  | <b>.022</b>       | 1.32 | 1.04     | 1.67  |
| <i>SLC6A2</i> rs2242446 genotype | .51     | .19  | 6.78  | <b>.009</b>       | 1.67 | 1.13     | 2.42  |

Abbreviations: 95% C.I., 95% confidence interval;  $\beta$ , regression coefficient; MDE, major depressive episode; OR, odds ratio; S.E., standard error; VEN, venlafaxine.

**TABLE S5.** Effect of the first two principal components on the association analyses between the three outcomes of interest and *SLC6A2* rs2242446 genotype.

| Parameters        | % $\Delta$ MADRS |          | Remission Status  |          | Time-to Remission |          |
|-------------------|------------------|----------|-------------------|----------|-------------------|----------|
|                   | ( $\eta^2$ )     | <i>p</i> | OR [95% C.I.]     | <i>p</i> | ( $\chi^2$ )      | <i>p</i> |
| Original analysis | 0.30             | 0.006    | 1.66 [1.13, 2.42] | 0.009    | 9.47              | 0.009    |
| Incl. C1          | 0.33             | 0.004    | 1.70 [1.16, 2.50] | 0.006    | N/A               | N/A      |
| Incl. C1 and C2   | 0.32             | 0.004    | 1.71 [1.16, 2.50] | 0.006    | N/A               | N/A      |

Note. Each analysis is multivariate as described in the manuscript, already including covariates: age, sex, recruitment site, baseline MADRS score and duration in treatment.

**TABLE S6.** Genetic variant association with phenotypes in the African-ancestry subsample ( $N = 33$ ).

| Gene               | Variant                | % $\Delta$ MADRS<br>( $\eta^2$ ) | Remission<br>OR [95% C.I.] | Time-to Remission<br>( $X^2$ ) |
|--------------------|------------------------|----------------------------------|----------------------------|--------------------------------|
| SLC6A2             | rs2242446              | 0.084                            | 3.81 [0.54, 26.78]         | 4.84                           |
|                    | rs5569                 | 0.006                            | 2.24 [0.16, 29.78]         | 0.29                           |
| SLC6A4             | rs25531-LPR            | 0.22                             | 0.62 [0.35, 1.04]          | 6.91                           |
|                    | VNTR                   | 0.084                            | 0.30 [0.04, 2.30]          | 2.60                           |
| HTR1A              | rs6295                 | 0.049                            | 0.99 [0.19, 5.06]          | 1.39                           |
| HTR1B              | rs11568817             | 0.030                            | 1.21 [0.24, 6.09]          | 0.97                           |
|                    | rs130058               | 0.024                            | 3.38 [0.21, 53.18]         | 1.76                           |
|                    | rs6296                 | 0.055                            | 1.79 [0.31, 10.34]         | 1.09                           |
| HTR2A              | rs2274639              | 0.049                            | 1.25 [0.29, 5.50]          | 0.94                           |
|                    | rs6311                 | 0.010                            | 1.28 [0.27, 6.06]          | 0.40                           |
|                    | rs9567746              | 0.010                            | 0.24 [0.01, 4.10]          | 1.22                           |
| HTR2C <sup>b</sup> | rs3813929 <sub>F</sub> | -.a                              | -.a                        | -.a                            |
|                    | rs3813929 <sub>M</sub> | -.a                              | -.a                        | 0.78                           |
|                    | rs51814 <sub>F</sub>   | 0.017                            | -.a                        | 0.32                           |
|                    | rs51814 <sub>M</sub>   | -.a                              | -.a                        | 2.14                           |
|                    | rs6318 <sub>F</sub>    | 0.018                            | -.a                        | 0.03                           |
|                    | rs6318 <sub>M</sub>    | -.a                              | -.a                        | 2.14                           |
|                    | rs6644093 <sub>F</sub> | -.a                              | -.a                        | -.a                            |
|                    | rs6644093 <sub>M</sub> | -.a                              | -.a                        | -.a                            |
|                    | rs1801412 <sub>F</sub> | -.a                              | -.a                        | -.a                            |
|                    | rs1801412 <sub>M</sub> | -.a                              | -.a                        | -.a                            |
| TPH1               | rs1800532              | 0.10                             | 3.10 [0.50, 19.18]         | 1.94                           |
| TPH2               | rs11178997             | 0.018                            | 0.78 [0.14, 4.16]          | 0.70                           |
|                    | rs11178998             | 0.017                            | -                          | 9.04**                         |
|                    | rs4570625              | 0.062                            | 1.78 [0.42, 7.51]          | 3.45                           |

*Abbreviations.*  $\Delta$ , change; F, female; M, male;  $X^2$ , Mantel-Cox chi-squared;  $\eta^2$ , partial eta squared; OR, odds ratio

*Note.* Presented p-values are not adjusted for multiple testing. Bonferroni-adjust thresholds are 0.0125 and 0.0031 for primary and secondary analyses, respectively.

<sup>a</sup>Too few remitter/genotype cases to conduct analysis.

<sup>b</sup>Analyses conducted separately for males and females due to the location of *HTR2C* on the X-chromosome

*Significance levels:* \*\* $p \leq 0.01$ , \* $p \leq 0.05$ .
